# Supplementary material for: Vitamin C enhances the ex vivo proliferation of porcine muscle stem cells for cultured meat production
Source: Royal Society of Chemistry journal article supplement (doi:10.1039/d1fo04340d), 2022-01-01
Supplement: d1fo04340d1.pdf [file d1fo04340d1.pdf]

### ***Supplementary information***

Jiahua Fang<sup>a,b</sup>, Mei Li<sup>a,b</sup>, Guoqiang Zhang<sup>a,b,c</sup>, Guocheng Du<sup>a,b,c</sup>, Jingwen Zhou<sup>a,b,c</sup>, Xin Guan<sup>\*a,b,c</sup>, and Jian Chen<sup>\*a,b,c</sup>

<sup>a</sup> *Key Laboratory of Industrial Biotechnology, Ministry of Education, School of Biotechnology, Jiangnan University, Wuxi, Jiangsu 214122, China;*

<sup>b</sup> *Science Center for Future Foods, Jiangnan University, Wuxi, Jiangsu 214122, China;*

<sup>c</sup> *Engineering Research Center of Ministry of Education on Food Synthetic Biotechnology, Jiangnan University, Wuxi 214122, China*

*\* Corresponding author.*

*Jian Chen, Xin Guan*

*Science Center for Future Foods, Jiangnan University, 1800 Lihu Rd, Wuxi, Jiangsu 214122, China.*

*Phone: +86-510-85329031, Fax: +86-510-85918309*

*E-mail: jchen@jiangnan.edu.cn, guanxin@jiangnan.edu.cn.*

## Western Blot-Related to Figure 2

### 1. Pax7

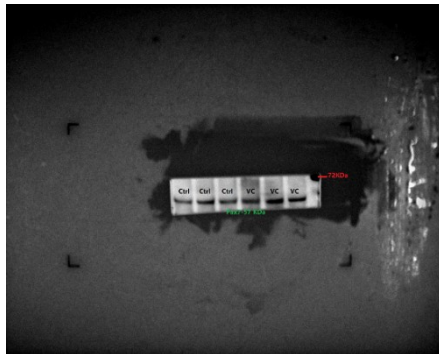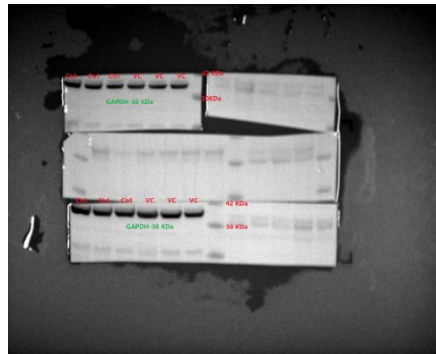

### 2. MyoD-

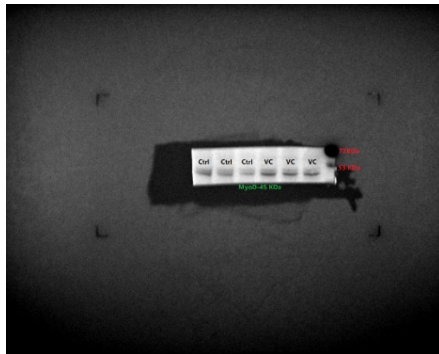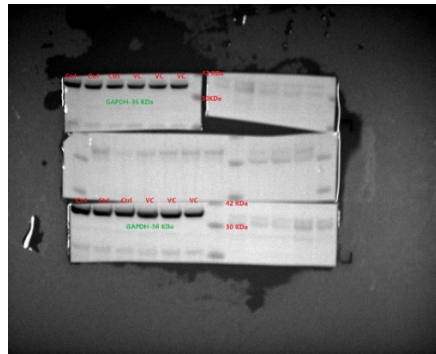

### 3. MyHC

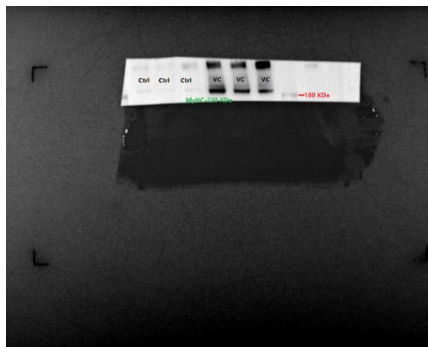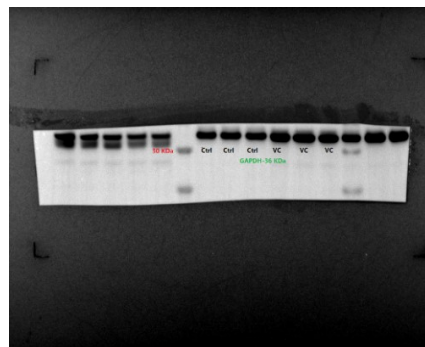

## Western Blot- Related to Figure 4

### 1. p-PI3K

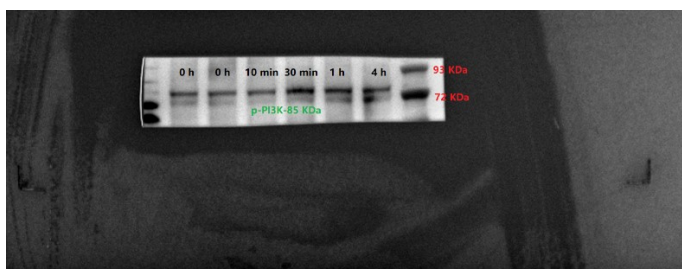

## 2. PI3K

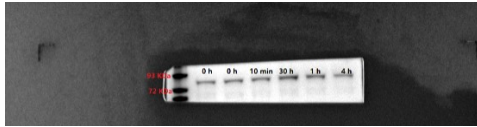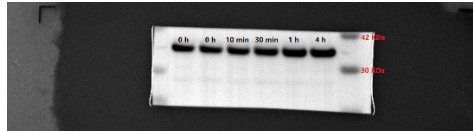

## 3. p-Akt

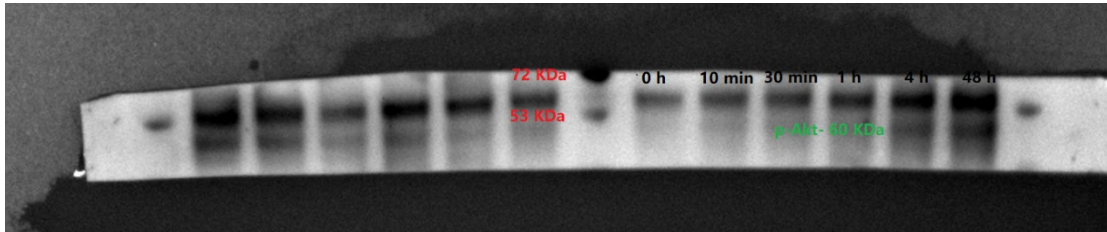

## 4. Akt

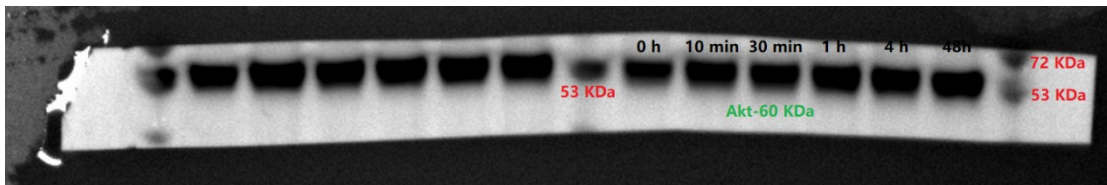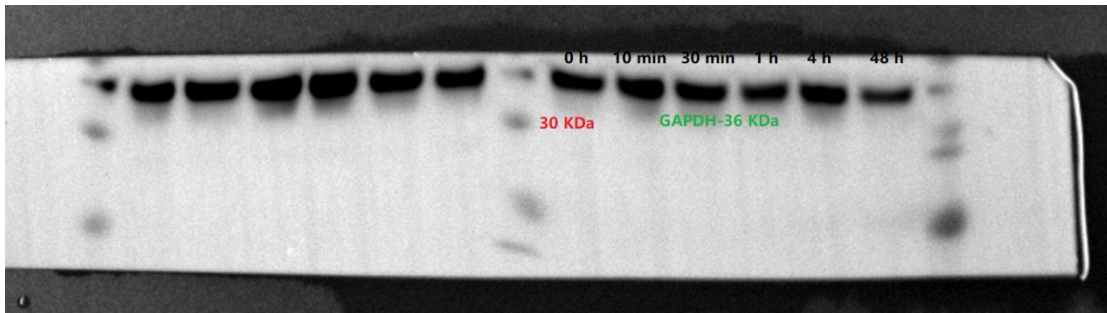

## 5. p-mTOR

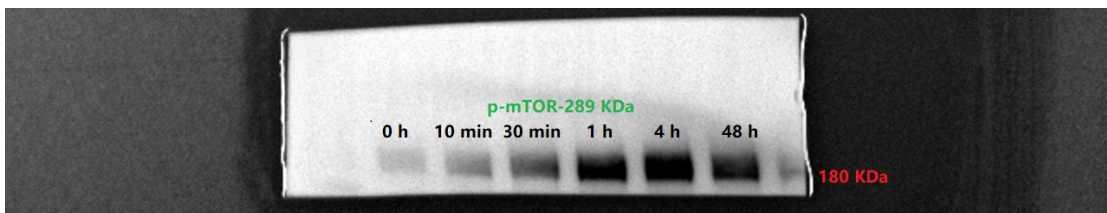

## 6. mTOR

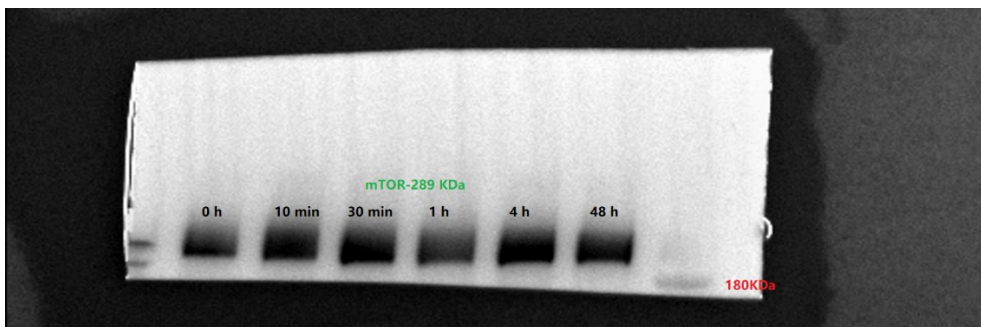

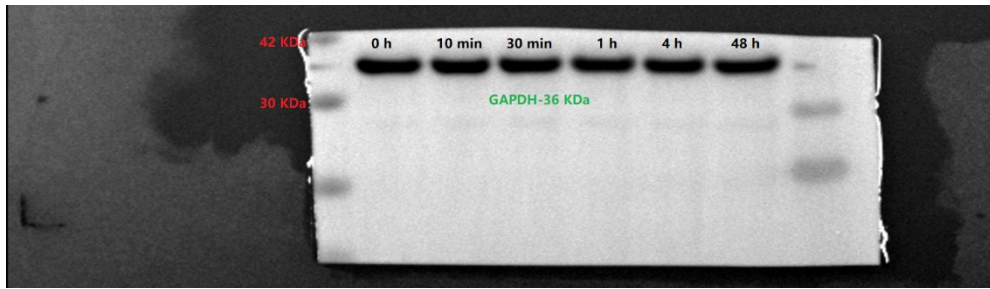

### 7. p-P70S6K

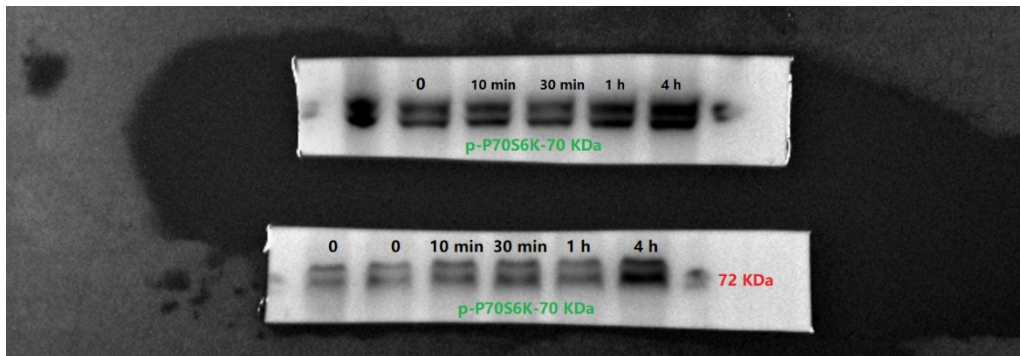

### 8. P70S6K

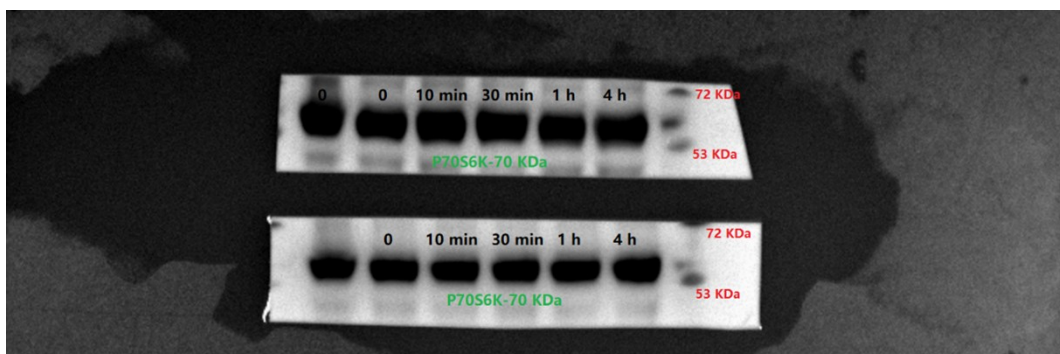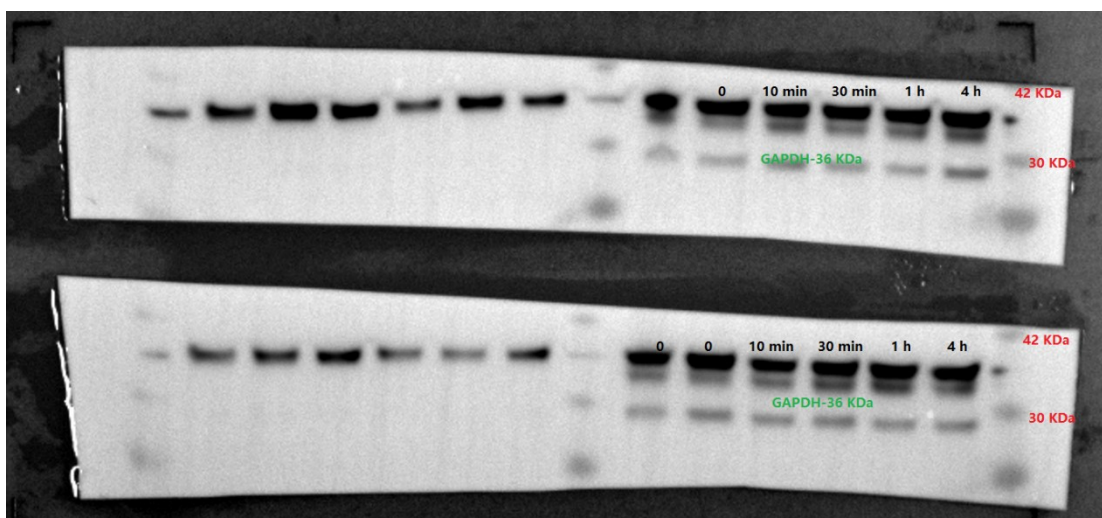

## Western Blot- Related to Figure 5

### 1. IGF-1

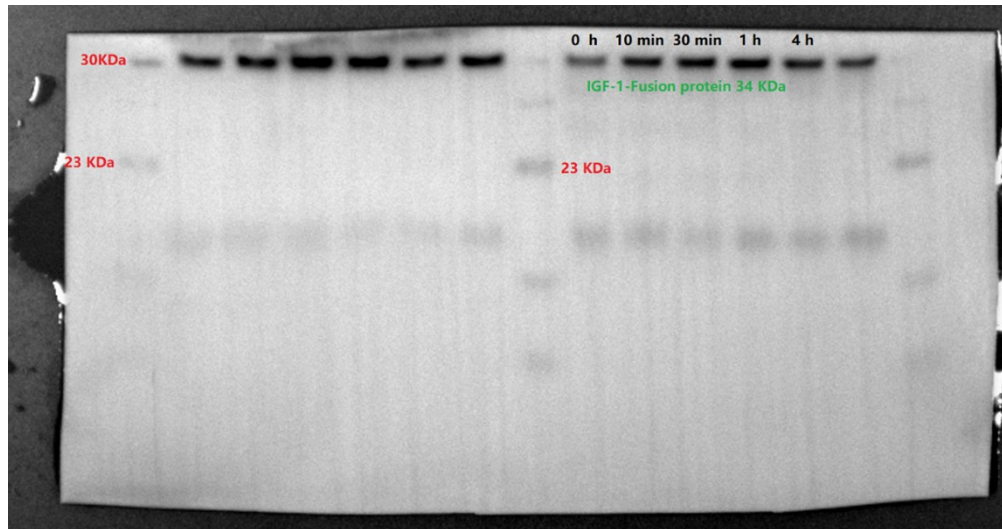

### 2. p-IGF-1R

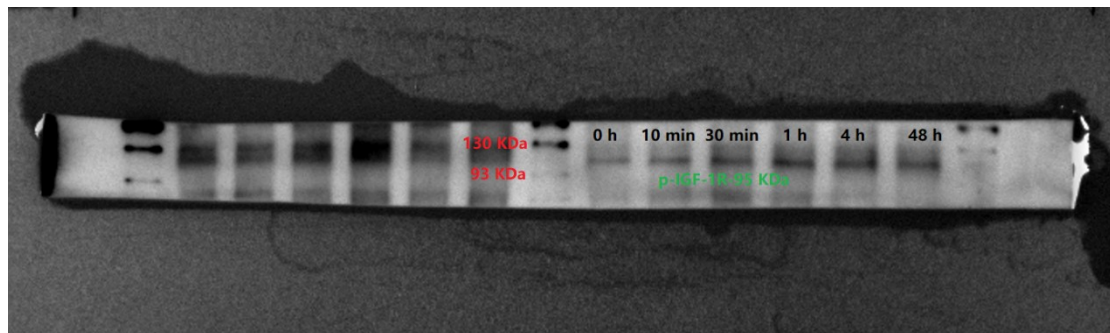

### 3. IGF-1R

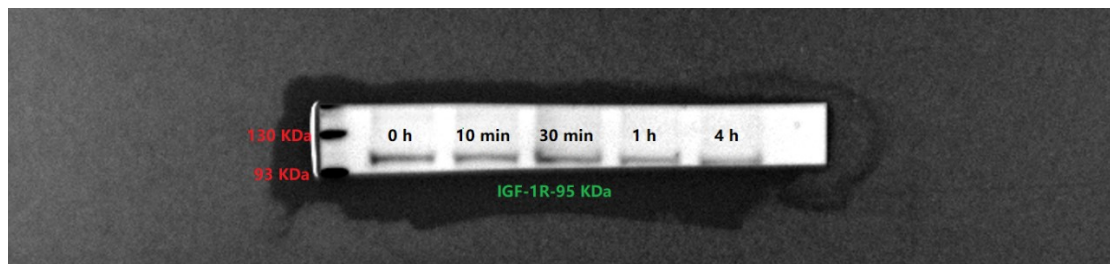

### 4. SVCT2

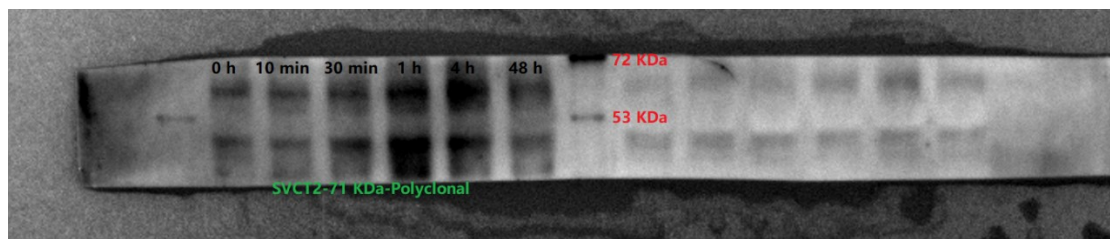

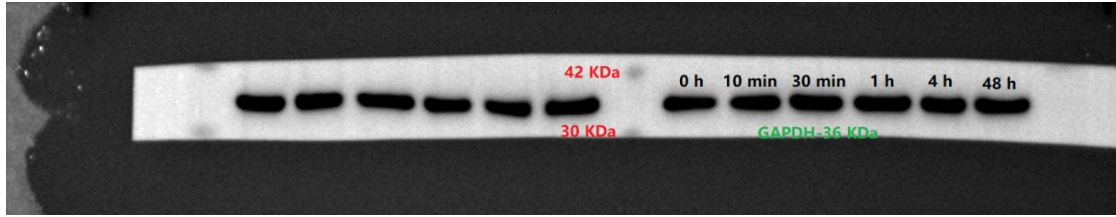

5. p-mTOR

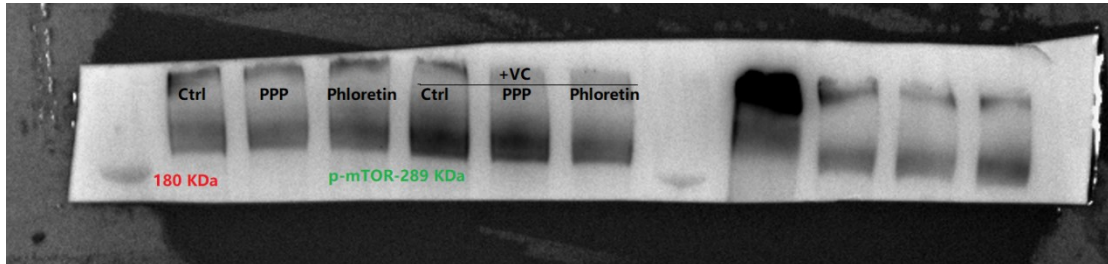

6. mTOR

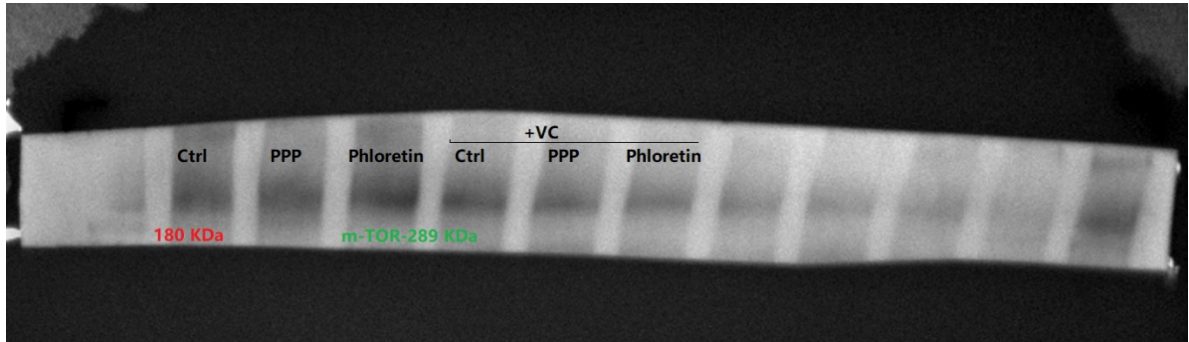

7. p-PI3K

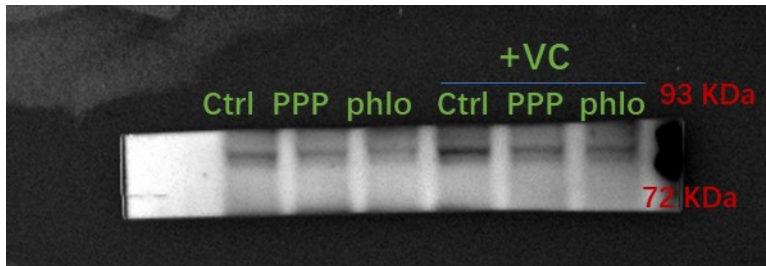

8. PI3K

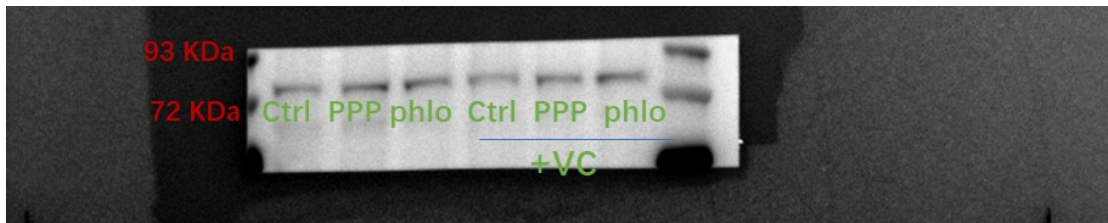

9. p-Akt

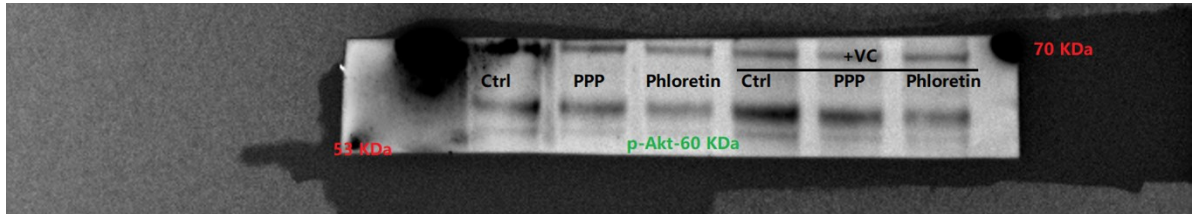

10. Akt

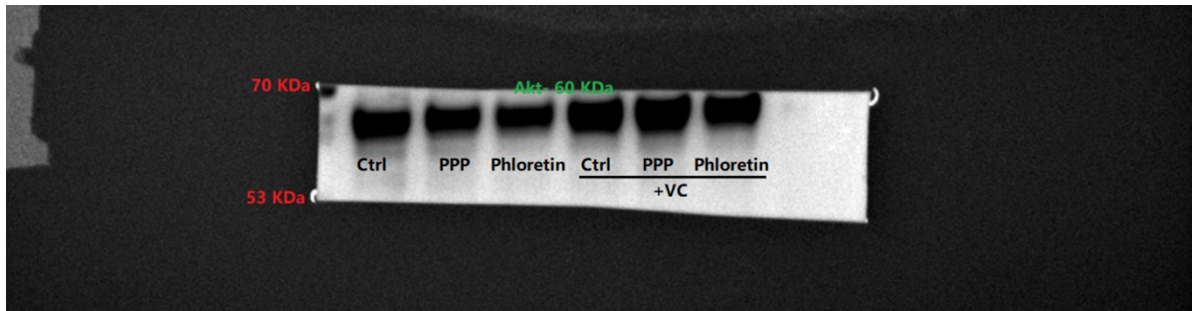

11. p-P70S6K

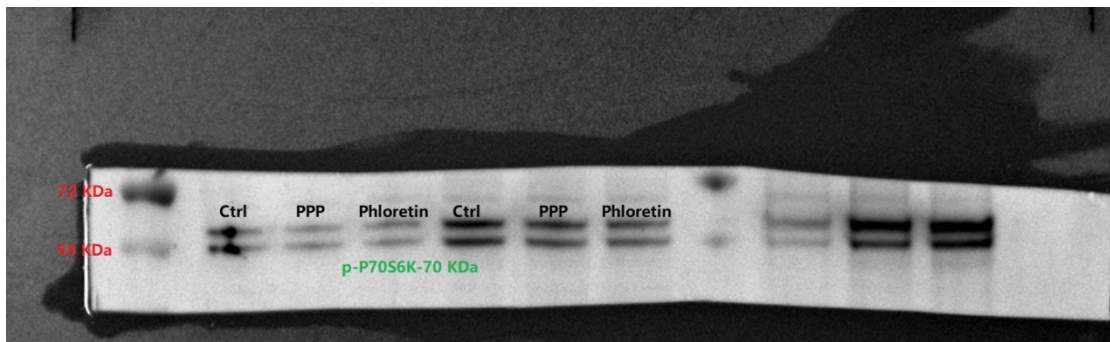

12. P70S6K

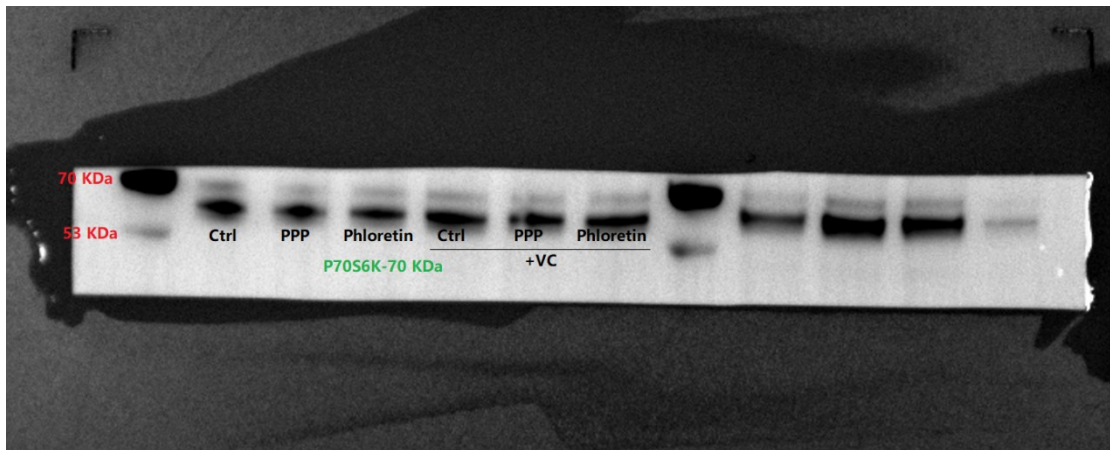

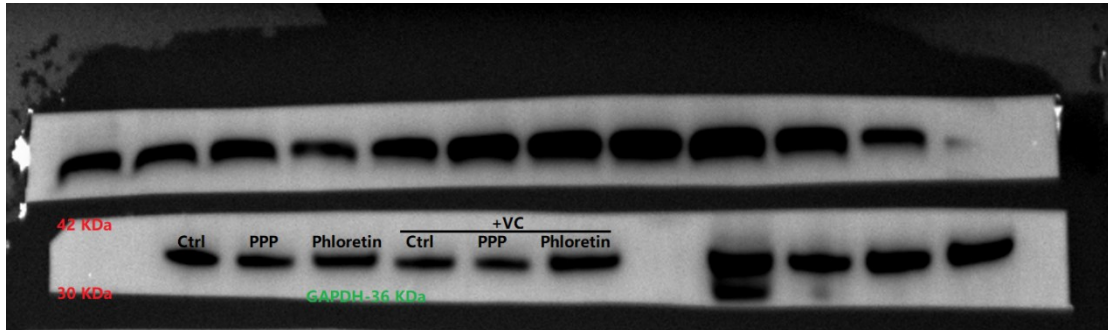

Quantitative values of Figure 5E-p-PI3K/PI3K (three independent experiments)

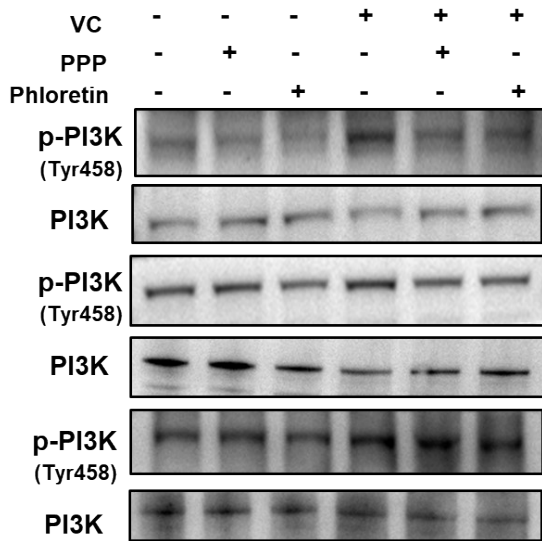

| p-pi3k |          |  | pi3k |          |          | Normalized to ctrl |  |
|--------|----------|--|------|----------|----------|--------------------|--|
| 1      | 4351.48  |  | 1    | 12098.53 | 0.35967  | 1.003479695        |  |
| 2      | 2926.066 |  | 2    | 10068.21 | 0.290624 | 0.810841824        |  |
| 3      | 3128.622 |  | 3    | 9896.087 | 0.316147 | 0.882051197        |  |
| 4      | 5855.856 |  | 4    | 9792.794 | 0.597976 | 1.668353101        |  |
| 5      | 3895.208 |  | 5    | 9182.38  | 0.424205 | 1.183530884        |  |
| 6      | 4218.794 |  | 6    | 9527.945 | 0.442781 | 1.235359278        |  |
| 1      | 7514.075 |  | 1    | 14079.79 | 0.533678 | 1.008651245        |  |
| 2      | 7749.388 |  | 2    | 13023.95 | 0.595011 | 1.124570422        |  |
| 3      | 6862.903 |  | 3    | 11907.87 | 0.576333 | 1.089269728        |  |
| 4      | 9324.409 |  | 4    | 9058.953 | 1.029303 | 1.945382983        |  |
| 5      | 7418.752 |  | 5    | 11070.27 | 0.670151 | 1.266585646        |  |
| 6      | 7892.631 |  | 6    | 12307.97 | 0.641262 | 1.211984409        |  |
| 1      | 9970.149 |  | 1    | 14547.63 | 0.685345 | 1.028018145        |  |
| 2      | 10483.79 |  | 2    | 12747.87 | 0.822395 | 1.233593037        |  |
| 3      | 9272.53  |  | 3    | 12618.47 | 0.734838 | 1.102256676        |  |
| 4      | 12882.45 |  | 4    | 10045.45 | 1.282416 | 1.923624584        |  |
| 5      | 10326.47 |  | 5    | 8794.945 | 1.174137 | 1.761205784        |  |
| 6      | 8298.359 |  | 6    | 8228.602 | 1.008477 | 1.512716073        |  |
